# Supplementary material for: Activation of c-Jun by human cytomegalovirus UL42 through JNK activation
Source: PLOS journal article supplement (doi:10.1371/journal.pone.0232635), 2020-05-05

Original images for immunoblots presented in Figure 4A

c-Jun

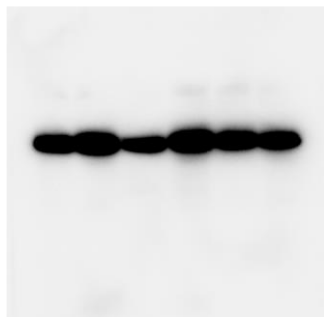

JNK

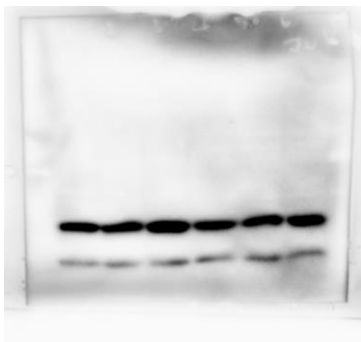

HA

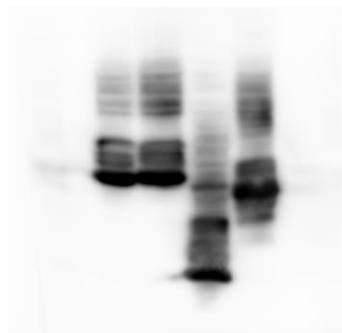

p-c-Jun

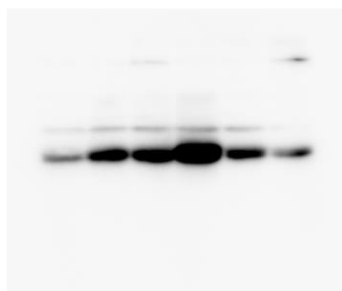

p-JNK

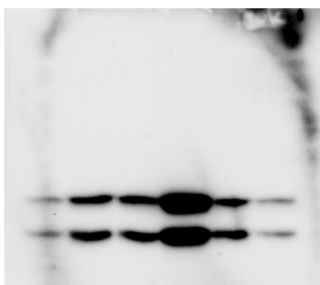

actin

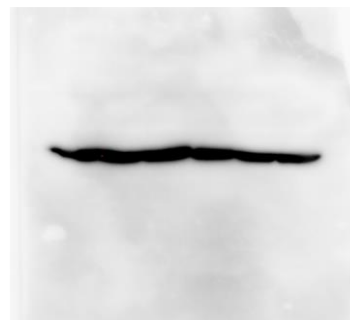

Itch

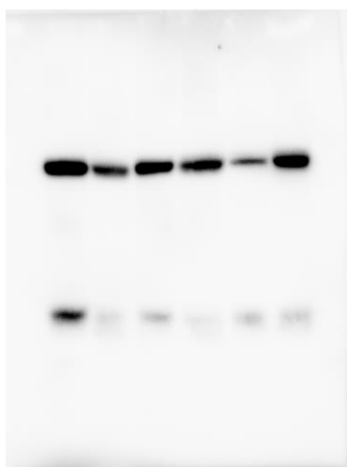

Original images for immunoblots presented in Figure 4B

c-Jun

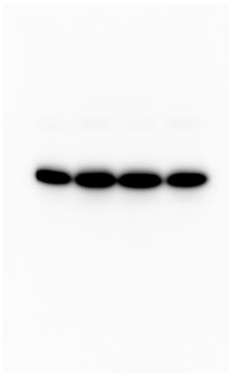

JNK

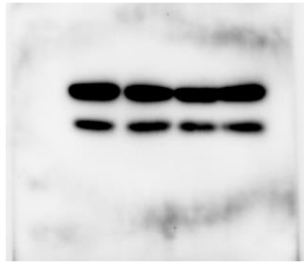

EGFP

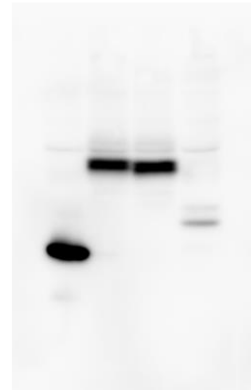

p-c-Jun

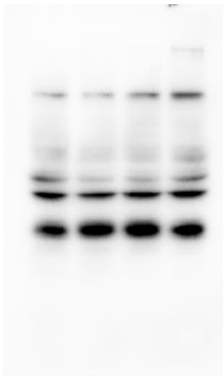

p-JNK

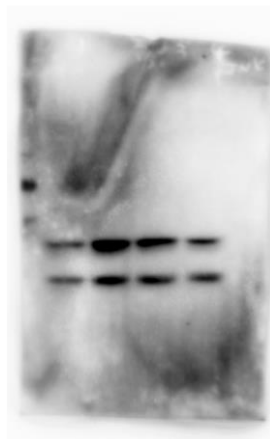

actin

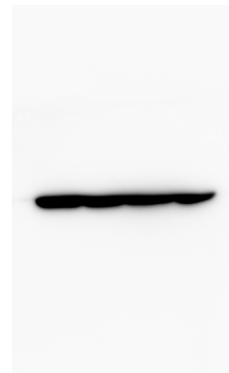

Itch

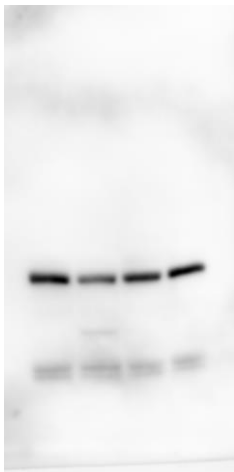

# Original images for immunoblots presented in Figure S2

UL42

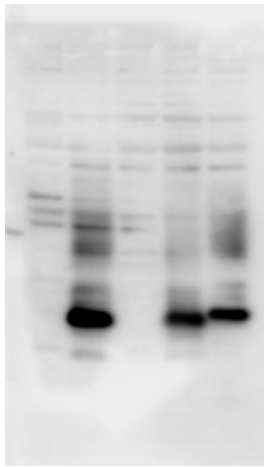

c-Jun

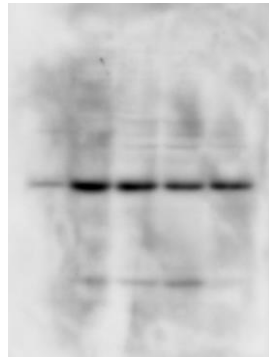

p-c-Jun

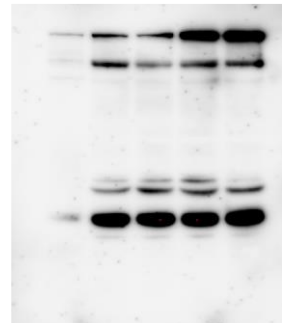

actin

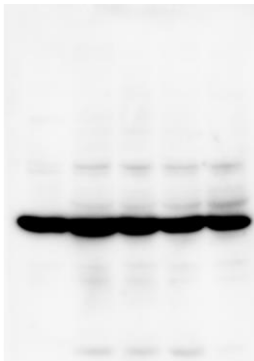

Supplement: S1 (10.1371/journal.pone.0232635.s001) [file journal.pone.0232635.s001]
